# Supplementary material for: Selection of Conditions in PVB Polymer Dissolution Process for Laminated Glass Recycling Applications
Source: MDPI journal article supplement (doi:10.3390/polym14235119), 2022-11-24
Supplement: s1 [file s1]

**Table S1.** PVB weight percent in IPA as a function of the dissolution time,  $t$  at  $T = 298.15$  K, the stirrer speed of 500 rpm, and polymer size  $30.0 \times 30.0 \times 0.82$  mm.

| $t/h$                                           | $wt\%$ PVB | DISS. PVB/% | $t/h$ | $wt\%$ PVB | DISS. PVB/% |
|-------------------------------------------------|------------|-------------|-------|------------|-------------|
| Initial volume of 2-propanol, $V_{IPA} = 30$ ml |            |             |       |            |             |
| 0                                               | 0          | 0           | 3.20  | 1.42       | 48          |
| 0.30                                            | 0.20       | 7           | 4.00  | 1.67       | 57          |
| 0.60                                            | 0.20       | 7           | 4.40  | 1.90       | 65          |
| 1.20                                            | 0.53       | 18          | 6.40  | 2.25       | 77          |
| 2.00                                            | 0.64       | 22          | 8.40  | 2.69       | 92          |
| 2.40                                            | 0.90       | 31          | 10.00 | 2.93       | 100         |
| Initial volume of 2-propanol, $V_{IPA} = 15$ ml |            |             |       |            |             |
| 0                                               | 0          | 0           | 3.20  | 3.52       | 56          |
| 0.30                                            | 0.76       | 12          | 4.00  | 4.10       | 66          |
| 0.60                                            | 0.76       | 12          | 4.40  | 4.34       | 70          |
| 1.20                                            | 1.67       | 27          | 6.40  | 5.05       | 81          |
| 2.00                                            | 2.13       | 34          | 8.40  | 5.95       | 95          |
| 2.40                                            | 2.93       | 47          | 10.00 | 6.24       | 100         |
| Initial volume of 2-propanol, $V_{IPA} = 10$ ml |            |             |       |            |             |
| 0                                               | 0          | 0           | 3.20  | 5.16       | 54          |
| 0.30                                            | 0.76       | 8           | 4.00  | 5.88       | 62          |
| 0.60                                            | 1.44       | 15          | 4.40  | 6.47       | 68          |
| 1.20                                            | 2.24       | 24          | 6.40  | 8.52       | 90          |
| 2.00                                            | 3.28       | 35          | 8.40  | 9.25       | 97          |
| 2.40                                            | 4.34       | 46          | 10.00 | 9.49       | 100         |

$wt\%$  PVB is the PVB weight percent in solution, DISS. PVB/% is the percent of dissolved PVB.  
Standard uncertainties are  $u(t) = 0.03$  h,  $u(T) = 0.05$  K,  $u(p) = 2$  kPa,  $u(wt\% \text{ PVB}) = 0.05$ ,  
 $u(\text{Dissolved PVB}) = 5\%$ .

**Table S2.** PVB weight percent in IPA as a function of the dissolution time,  $t$  at  $T = 298.15$  K, the stirrer speed of 500 rpm, and polymer size  $10.0 \times 10.0 \times 0.82$  mm.

| $t/h$                                           | $wt\%$ PVB | DISS. PVB/% | $t/h$ | $wt\%$ PVB | DISS. PVB/% |
|-------------------------------------------------|------------|-------------|-------|------------|-------------|
| Initial volume of 2-propanol, $V_{IPA} = 10$ ml |            |             |       |            |             |
| 0.00                                            | 0.00       | 0           | 4.00  | 0.87       | 79          |
| 0.50                                            | 0.20       | 18          | 5.50  | 1.10       | 100         |
| 2.00                                            | 0.42       | 38          | 7.00  | 1.10       | 100         |
| 3.00                                            | 0.76       | 69          |       |            |             |

$wt\%$  PVB is the PVB weight percent in solution, DISS. PVB/% is the percent dissolved PVB.  
Standard uncertainties are  $u(t) = 0.03$  h,  $u(T) = 0.05$  K,  $u(p) = 2$  kPa,  $u(wt\% \text{ PVB}) = 0.05$ ,  
 $u(\text{Dissolved PVB}) = 5\%$ .

**Table S3.** PVB weight percent in IPA as a function of the dissolution time,  $t$ , the initial volume of 2-propanol,  $V_{\text{IPA}} = 10$  ml, the stirrer speed of 500 rpm, and polymer size  $30.0 \times 30.0 \times 0.82$  mm.

| $t/\text{h}$   | $wt\%$ PVB | DISS. PVB/% | $t/\text{h}$ | $wt\%$ PVB | DISS. PVB/% |
|----------------|------------|-------------|--------------|------------|-------------|
| $T = 308.15$ K |            |             |              |            |             |
| 0.00           | 0.00       | 0           | 3.50         | 6.19       | 68          |
| 0.50           | 1.98       | 22          | 4.50         | 7.35       | 81          |
| 1.00           | 2.67       | 29          | 5.50         | 8.12       | 89          |
| 1.50           | 3.63       | 40          | 6.50         | 8.95       | 98          |
| 2.00           | 4.10       | 45          | 7.50         | 9.13       | 100         |
| 2.50           | 5.05       | 55          | 8.50         | 9.13       | 100         |
| 3.00           | 5.51       | 60          |              |            |             |
| $T = 318.15$ K |            |             |              |            |             |
| 0.00           | 0.00       | 0           | 1.60         | 5.64       | 61          |
| 0.30           | 1.21       | 13          | 2.00         | 7.07       | 77          |
| 0.60           | 3.52       | 38          | 3.00         | 9.00       | 97          |
| 1.00           | 4.10       | 44          | 3.30         | 9.25       | 100         |
| 1.30           | 5.28       | 57          |              |            |             |

$wt\%$  PVB is the PVB weight percent in solution, DISS. PVB/% is the percent dissolved PVB.

Standard uncertainties are  $u(t) = 0.03$  h,  $u(T) = 0.05$  K,  $u(p) = 2$  kPa,  $u(wt\% \text{ PVB}) = 0.05$ ,

$u(\text{Dissolved PVB}) = 5\%$ .

**Table S4.** PVB weight percent in IPA as a function of the dissolution time,  $t$ , the initial volume of 2-propanol,  $V_{\text{IPA}} = 15$  ml, and polymer size  $30.0 \times 30.0 \times 0.82$  mm. Dissolution process with ultrasound.

| $t/\text{h}$ | $wt\%$ PVB | DISS. PVB/% | $T/\text{K}$ | $t/\text{h}$ | $wt\%$ PVB | DISS. PVB/% | $T/\text{K}$ |
|--------------|------------|-------------|--------------|--------------|------------|-------------|--------------|
| 0.00         | 0.00       | 0           | 296.3        | 1.25         | 5.68       | 93          | 315.4        |
| 0.25         | 1.85       | 30          | 300.2        | 1.50         | 6.02       | 98          | 317.5        |
| 0.50         | 3.39       | 55          | 305.6        | 2.00         | 6.13       | 100         | 319.3        |
| 0.75         | 3.97       | 65          | 308.7        | 2.25         | 6.13       | 100         | 319.7        |
| 1.00         | 4.89       | 80          | 312.2        | 2.50         | 6.13       | 100         | 320.3        |

$wt\%$  PVB is the PVB weight percent in solution, DISS. PVB/% is the percent dissolved PVB.  $T$  is the temperature of the ultrasonic bath during the process. Standard uncertainties are  $u(t) = 0.03$  h,  $u(T) = 0.05$  K,  $u(p) = 2$  kPa,  $u(wt\% \text{ PVB}) = 0.05$ ,  $u(\text{Dissolved PVB}) = 5\%$ .

**Table S5.** PVB weight percent in { IPA + AcOEt,  $V/V = 1/1$ } as a function of the dissolution time,  $t$  at  $T = 298.15$  K, the stirrer speed of 500 rpm, and polymer size  $30.0 \times 30.0 \times 0.82$  mm.

| $t/\text{h}$                                                                               | $wt\%$ PVB | DISS. PVB/% | $t/\text{h}$ | $wt\%$ PVB | DISS. PVB/% |
|--------------------------------------------------------------------------------------------|------------|-------------|--------------|------------|-------------|
| Initial volume of 2-propanol + ethyl acetate, $V/V = 1/1$ , $V_{\text{IPA+AcOEt}} = 30$ ml |            |             |              |            |             |
| 0.00                                                                                       | 0.00       | 0           | 1.50         | 2.63       | 75          |
| 0.25                                                                                       | 0.13       | 4           | 1.75         | 2.97       | 85          |
| 0.50                                                                                       | 0.59       | 17          | 2.00         | 3.20       | 91          |
| 0.75                                                                                       | 1.28       | 36          | 2.25         | 3.52       | 100         |
| 1.00                                                                                       | 1.39       | 40          | 2.50         | 3.52       | 100         |
| 1.25                                                                                       | 1.86       | 53          |              |            |             |
| Initial volume of 2-propanol + ethyl acetate, $V/V = 1/1$ , $V_{\text{IPA+AcOEt}} = 15$ ml |            |             |              |            |             |
| 0.00                                                                                       | 0.00       | 0           | 1.50         | 4.93       | 73          |
| 0.25                                                                                       | 0.24       | 4           | 1.75         | 5.36       | 80          |
| 0.50                                                                                       | 1.28       | 19          | 2.00         | 5.80       | 86          |
| 0.75                                                                                       | 2.41       | 36          | 2.25         | 6.71       | 100         |

|                                                                                            |      |    |      |      |     |
|--------------------------------------------------------------------------------------------|------|----|------|------|-----|
| 1.00                                                                                       | 2.98 | 44 | 2.50 | 6.71 | 100 |
| 1.25                                                                                       | 4.27 | 64 |      |      |     |
| Initial volume of 2-propanol + ethyl acetate, $V/V = 1/1$ , $V_{\text{IPA+AcOEt}} = 10$ ml |      |    |      |      |     |
| 0.00                                                                                       | 0.00 | 0  | 1.50 | 5.67 | 64  |
| 0.25                                                                                       | 1.17 | 13 | 1.75 | 6.81 | 77  |
| 0.50                                                                                       | 2.63 | 30 | 2.00 | 8.74 | 99  |
| 0.75                                                                                       | 3.74 | 42 | 2.25 | 8.84 | 100 |
| 1.00                                                                                       | 4.60 | 52 | 2.50 | 8.84 | 100 |
| 1.25                                                                                       | 4.82 | 55 |      |      |     |

$wt\%$  PVB is the PVB weight percent in solution, DISS. PVB/% is the percent of dissolved PVB. Standard uncertainties are  $u(t) = 0.03$  h,  $u(T) = 0.05$  K,  $u(p) = 2$  kPa,  $u(wt\% \text{ PVB}) = 0.05$ ,  $u(\text{Dissolved PVB}) = 5\%$ .

**Table S6.** PVB weight percent in { IPA + AcOEt,  $V/V = 1/1$ } as a function of the dissolution time,  $t$ , the initial volume of solvent,  $V_{\text{IPA+AcOEt}} = 10$  ml, the stirrer speed of 500 rpm, and polymer size  $30.0 \times 30.0 \times 0.82$  mm.

| $t/\text{h}$   | $wt\% \text{ PVB}$ | DISS. PVB/% | $t/\text{h}$ | $wt\% \text{ PVB}$ | DISS. PVB/% |
|----------------|--------------------|-------------|--------------|--------------------|-------------|
| $T = 308.15$ K |                    |             |              |                    |             |
| 0.00           | 0.00               | 0           | 1.00         | 6.70               | 78          |
| 0.17           | 1.66               | 19          | 1.25         | 8.57               | 100         |
| 0.50           | 3.64               | 43          | 1.50         | 8.57               | 100         |
| 0.75           | 5.01               | 58          |              |                    |             |
| $T = 318.15$ K |                    |             |              |                    |             |
| 0.00           | 0.00               | 0           | 0.42         | 5.31               | 61          |
| 0.08           | 1.14               | 13          | 0.50         | 7.04               | 80          |
| 0.17           | 2.52               | 29          | 0.58         | 8.77               | 100         |
| 0.25           | 3.86               | 44          | 0.67         | 8.77               | 100         |
| 0.33           | 4.97               | 57          |              |                    |             |

$wt\%$  PVB is the PVB weight percent in solution, DISS. PVB/% is the percent dissolved PVB. Standard uncertainties are  $u(t) = 0.03$  h,  $u(T) = 0.05$  K,  $u(p) = 2$  kPa,  $u(wt\% \text{ PVB}) = 0.05$ ,  $u(\text{Dissolved PVB}) = 5\%$ .

**Table S7.** PVB weight percent in { IPA + AcOEt,  $V/V = 1/1$ } as a function of the dissolution time,  $t$ , the initial volume of 2-propanol,  $V_{\text{IPA}} = 15$  ml, and polymer size  $30.0 \times 30.0 \times 0.82$  mm. Dissolution process with ultrasound.

| $t/\text{h}$ | $wt\% \text{ PVB}$ | DISS. PVB/% | $T/\text{K}$ | $t/\text{h}$ | $wt\% \text{ PVB}$ | DISS. PVB/% | $T/\text{K}$ |
|--------------|--------------------|-------------|--------------|--------------|--------------------|-------------|--------------|
| 0.00         | 0.00               | 0           | 296.3        | 1.25         | 5.35               | 93          | 315.4        |
| 0.25         | 1.73               | 30          | 300.2        | 1.50         | 5.67               | 98          | 317.5        |
| 0.50         | 3.19               | 55          | 305.6        | 2.00         | 5.77               | 100         | 319.3        |
| 0.75         | 3.74               | 65          | 308.7        | 2.25         | 5.77               | 100         | 319.7        |
| 1.00         | 4.60               | 80          | 312.2        | 2.50         | 5.77               | 100         | 320.3        |

$wt\%$  PVB is the PVB weight percent in solution, DISS. PVB/% is the percent dissolved PVB.  $T$  is the temperature of the ultrasonic bath during the process. Standard uncertainties are  $u(t) = 0.03$  h,  $u(T) = 0.05$  K,  $u(p) = 2$  kPa,  $u(wt\% \text{ PVB}) = 0.05$ ,  $u(\text{Dissolved PVB}) = 5\%$ .

**Table S8.** The parameters of eq. 1 for correlation *wt%* PVB in IPA as a function of the dissolution time, *t*.

| System                                                                                                                                                                        | $10^2 \cdot A_1/h^2$ | $A_2/h$ | AARD  |
|-------------------------------------------------------------------------------------------------------------------------------------------------------------------------------|----------------------|---------|-------|
| Solvent: 2-propanol<br>$V_{IPA} = 30 \text{ ml}$<br>PVB size: $30.0 \times 30.0 \times 0.82 \text{ mm}$<br>$T = 298.15 \text{ K}$<br>Stirrer speed: 500 rpm                   | -1.707               | 0.4641  | 0.12  |
| Solvent: 2-propanol<br>$V_{IPA} = 15 \text{ ml}$<br>PVB size: $30.0 \times 30.0 \times 0.82 \text{ mm}$<br>$T = 298.15 \text{ K}$<br>Stirrer speed: 500 rpm                   | -6.764               | 1.296   | 0.079 |
| Solvent: 2-propanol<br>$V_{IPA} = 10 \text{ ml}$<br>PVB size: $30.0 \times 30.0 \times 0.82 \text{ mm}$<br>$T = 298.15 \text{ K}$<br>Stirrer speed: 500 rpm                   | -9.784               | 1.927   | 0.079 |
| Solvent: 2-propanol<br>$V_{IPA} = 10 \text{ ml}$<br>PVB size: <b><math>10.0 \times 10.0 \times 0.82 \text{ mm}</math></b><br>$T = 298.15 \text{ K}$<br>Stirrer speed: 500 rpm | -1.956               | 0.2980  | 0.090 |
| Solvent: 2-propanol<br>$V_{IPA} = 10 \text{ ml}$<br>PVB size: $30.0 \times 30.0 \times 0.82 \text{ mm}$<br>$T = 308.15 \text{ K}$<br>Stirrer speed: 500 rpm                   | -0.1557              | 2.385   | 0,073 |
| Solvent: 2-propanol<br>$V_{IPA} = 10 \text{ ml}$<br>PVB size: $30.0 \times 30.0 \times 0.82 \text{ mm}$<br>$T = 318.15 \text{ K}$<br>Stirrer speed: 500 rpm                   | -0.5652              | 4.667   | 0.054 |
| Solvent: 2-propanol<br>$V_{IPA} = 15 \text{ ml}$<br>PVB size: $30.0 \times 30.0 \times 0.82 \text{ mm}$<br>Stirrer speed: 500 rpm<br>Ultrasound                               | -0.3524              | 2.990   | 0.12  |

**Table S9.** The parameters of eq. 1 for correlation *wt%* PVB in { IPA + AcOEt, *V/V* = 1/1} as a function of the dissolution time, *t*.

| System                                                                                                                                                                      | $10^2 \cdot A_1/h^2$ | $A_2/h$ | AARD  |
|-----------------------------------------------------------------------------------------------------------------------------------------------------------------------------|----------------------|---------|-------|
| Solvent: 2-propanol + ethyl acetate<br>$V_{IPA} = 30 \text{ ml}$<br>PVB size: $30.0 \times 30.0 \times 0.82 \text{ mm}$<br>$T = 298.15 \text{ K}$<br>Stirrer speed: 500 rpm | -5.043               | 1.7007  | 0.32  |
| Solvent: 2-propanol + ethyl acetate<br>$V_{IPA} = 15 \text{ ml}$<br>PVB size: $30.0 \times 30.0 \times 0.82 \text{ mm}$<br>$T = 298.15 \text{ K}$<br>Stirrer speed: 500 rpm | -5.723               | 3.112   | 0.27  |
| Solvent: 2-propanol + ethyl acetate<br>$V_{IPA} = 10 \text{ ml}$<br>PVB size: $30.0 \times 30.0 \times 0.82 \text{ mm}$<br>$T = 298.15 \text{ K}$<br>Stirrer speed: 500 rpm | -53.93               | 5.141   | 0.065 |
| Solvent: 2-propanol + ethyl acetate<br>$V_{IPA} = 10 \text{ ml}$<br>PVB size: $30.0 \times 30.0 \times 0.82 \text{ mm}$<br>$T = 308.15 \text{ K}$<br>Stirrer speed: 500 rpm | -1.781               | 6.882   | 0.070 |
| Solvent: 2-propanol + ethyl acetate<br>$V_{IPA} = 10 \text{ ml}$<br>PVB size: $30.0 \times 30.0 \times 0.82 \text{ mm}$<br>$T = 318.15 \text{ K}$<br>Stirrer speed: 500 rpm | -1.779               | 14.93   | 0.047 |
| Solvent: 2-propanol + ethyl acetate<br>$V_{IPA} = 15 \text{ ml}$<br>PVB size: $30.0 \times 30.0 \times 0.82 \text{ mm}$<br>Stirrer speed: 500 rpm<br>Ultrasound             | -185.8               | 6.603   | 0.039 |

**Table S10.** The correlation parameters for liquid density of PVB solution in IPA or binary mixture {IPA + AcOEt V/V = 1/1}.

| System                           | $10^6 \cdot b_{11}/\text{K}^{-1}$ | $10^3 \cdot b_{12}$ | $10^3 \cdot b_{21}/\text{K}^{-1}$ | $b_{12}$ | $10^4 \cdot \sigma/\text{g} \cdot \text{cm}^{-3}$ |
|----------------------------------|-----------------------------------|---------------------|-----------------------------------|----------|---------------------------------------------------|
| PVB + IPA                        | -3.123                            | 3.256               | -1.050                            | 1.095    | 4.0                                               |
| PVB + {IPA + AcOEt<br>V/V = 1/1} | -6.365                            | 2.177               | -1.110                            | 1.164    | 3.6                                               |

**Table S11.** The correlation parameters for liquid dynamic viscosity of PVB solution in IPA or binary mixture {IPA + AcOEt V/V = 1/1}.

| System                           | $c_{11}$ | $c_{12}$ | $c_{21}/\text{K}$ | $c_{22}/\text{K}$ | $\sigma/\text{mPa} \cdot \text{s}$ |
|----------------------------------|----------|----------|-------------------|-------------------|------------------------------------|
| PVB + IPA                        | -0.5680  | -7.982   | 311.5             | 2733              | 2.5                                |
| PVB + {IPA + AcOEt<br>V/V = 1/1} | -0.6136  | -4.071   | 326.2             | 1475              | 7.5                                |

**Table S12.** The correlation parameters for refractive index of PVB solution in IPA or binary mixture {IPA + AcOEt V/V = 1/1}.

| System                           | $10^4 \cdot D_1$ | $D_2$  | $10^4 \cdot \sigma$ |
|----------------------------------|------------------|--------|---------------------|
| PVB + IPA                        | 8.382            | 1.3752 | 0.8                 |
| PVB + {IPA + AcOEt<br>V/V = 1/1} | 9.479            | 1.3707 | 1.4                 |

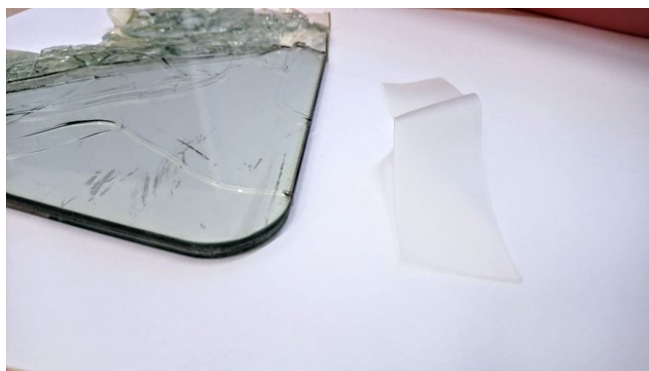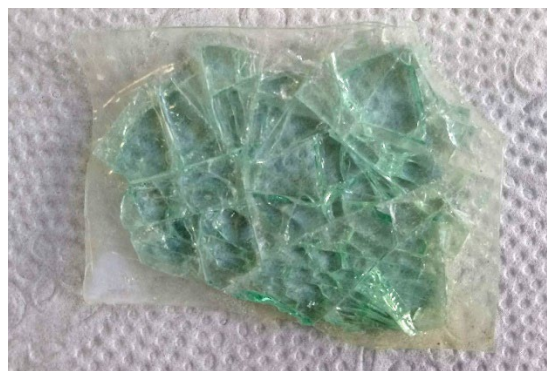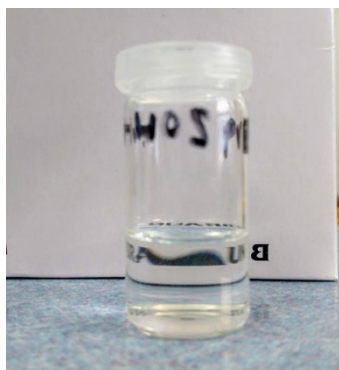

**Figure S1.** The testing sample of PVB and PVB solution in binary solvent mixtures {2-propanol + ethyl acetate,  $V/V = 1/1$ }.

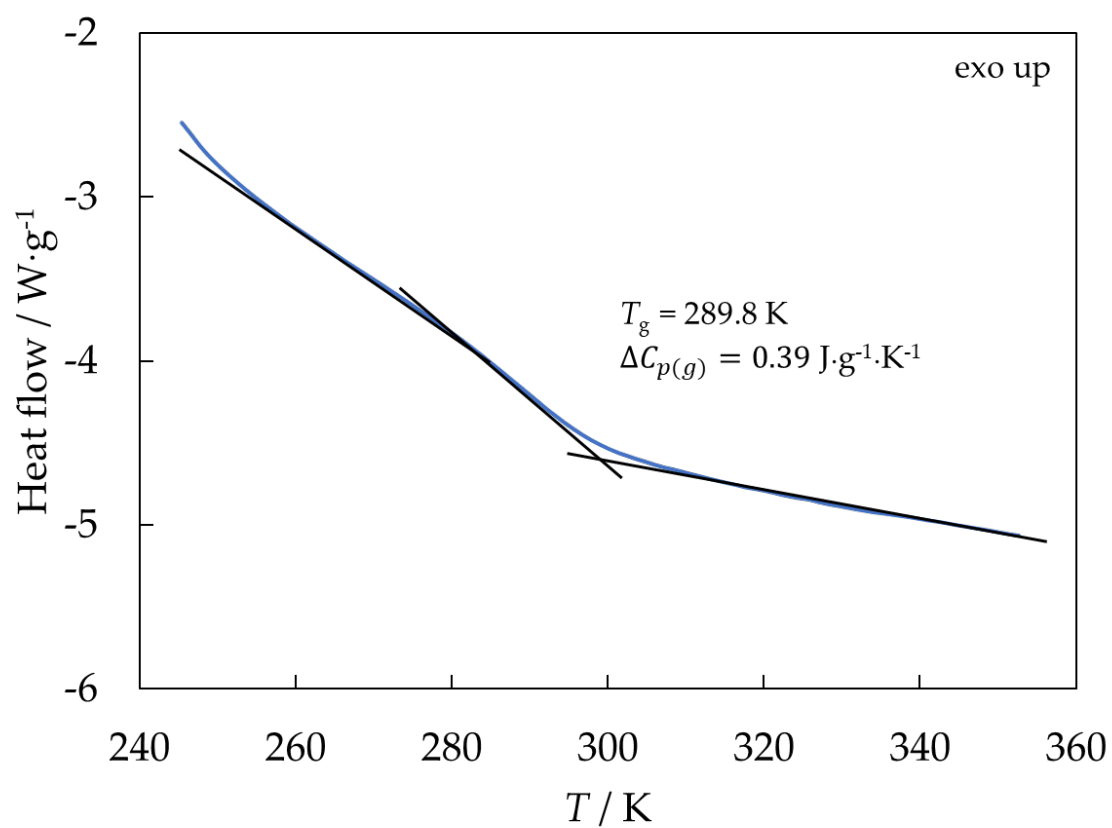

**Figure S2.** The DSC thermogram of PVB: Glass Transition Temperature,  $T_g/\text{K}$ ; Heat Capacity Change at Glass Transition Temperature,  $\Delta C_{p(g)}/\text{J.g}^{-1}.\text{T}^{-1}$
